# Supplementary material
Source: PubMed Central journal article supplement (PMC6317904)
Supplement: NIHMS965511-supplement-Supplement.pdf [file NIHMS965511-supplement-Supplement.pdf]

## Supplement 1 - Sequences used in this study

### Murine $\mu$ OR

MKTIIALSIFCLVFADYKDDDDAMGPGNISDCSDPLAPASCSPAPGSWLNLSHVDGNQSDPCGPNRTGLGE  
**NLYFQG**SHSLCPQTGSPSMVTAITIMALYSIVCVVGLFGNFLVMYVIVRYTKMKTATNIYIFNLALADALATST  
LPFQSVNYLMGTWPFGNILCKIVISIDYYNMFTSIFTLCTMSVDRIYAVCHPVKALDFRTPRNAKIVNVCNWIL  
SSAIGLPVMFMATTKYRQGSIDCTLTFSHPTWYWENLLKICVFIFAFIMPVLIITVCYGLMILRLKSVRMLSGSK  
EKDRNLRIRTRMVLVVVAVFIVCWTPIHIVYIICALITIPETTFQTVSWHFCIALGYTNSCLNPVLYAFLDENFKR  
CFREFCIPTSS**ILEVLFQ**GPEQQNSARIRQNTREHPSTANTVDRTNHQLENLEAETAPLPDIHHHHHH

TEV and 3C sites, respectively, labelled in bold. Receptor was cleaved prior to imaging.

### Human $G\alpha_{i1}$

MGCTLSAEDKAAVERSKMIDRNLRDGEKAAREVKLLLLGAGESGKSTIVKQMKIIEAGYSEE  
ECKQYKAVVYSNTIQSIIAIRAMGRLKIDFGDSARADDARQLFVLAGAAEEGFMTAELAGVIKRL  
WKDSGVQACFNRSREYQLNDSAAYYLNDLDRIAQPNYIPTQQDVLRRVKTGTGIVETHFTFKDL  
HFKMFDVGGQRSERKKWIHCFEVTAIIFCVALSVDYDLVLAEDEEMNRMHESMKLFDSDICNNK  
WFTDTSIILFLNKKDLFEEKIKKSPLTICYPEYAGSNTYEEAAAAYICQCFEDLNKRKDTKEIYTHFT  
CATDTKNVQFVFDVAVTDVVIKNNLKDCGLF

### Human $G\beta_1$

PGSSGSELDQLRQEAQKLNQIRDARKACADATLSQITNNIDPVGRIQMRTRRTRLRGHLAKIYA  
MHWGTDSRLLVSASQDGKLIWDSYTTNKVHAIPLRSSWVMTCAAPSGNYVACGGLDNICSI  
YNLKTREGNVRVSRELAGHTGYLSCCRFLDDNQIVTSSGDTTCALWDIETGQQTTTTFTGHTGD  
VMSLSLAPDTRLFVSGACDASAKLWDVREGMCRQTFTGHESDINAICFFPNGNAFATGSDDAT  
CRLFDLRADQELMTYSHDNIICGITSVSFSKSGRLLLAGYDDFNCNVWDALKADRAGVLAGHD  
NRVSCLGVTDDGMAVATGSWDSFLKIWN

### Human $G\gamma_2$

MASNNTASIAQARKLVEQLKMEANIDRIKVSAAAADLMAYCEAHAKEDPLLTPVPASENPFREK  
KFFCAIL

### scFv16

DVQLVESGGGLVQPGGSRKLSASGFASFSGMHVWRQAPEKGLEWVAYISSGSGTIYYADTVKGRFTISR  
DDPKNTLFLQMTSLRSEDAMYYCVRSIYYGSSPFDWQGTTLTVSSGGGGSGGGGSGGGGSDIVMTQ  
ATSSVPVTPGESVSISCRSSKLLHSNGNTYLYWFLQRPGQSPQLLIYRMSNLAGVDPDRFSGSGGTAFTLTIS  
RLEAEDVGVYYCMQHLEYPLTFGAGTKLELKAAAHHHHHHHH

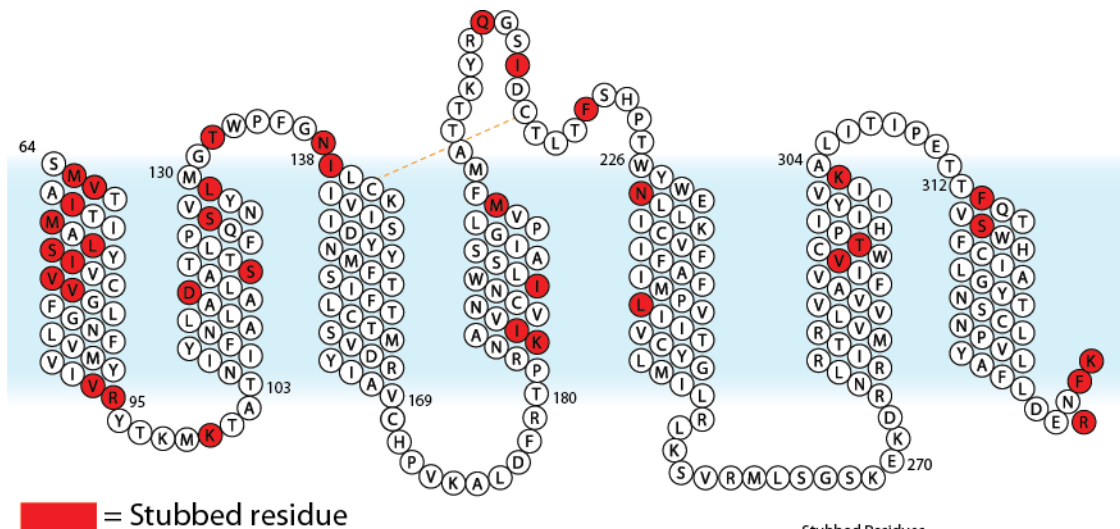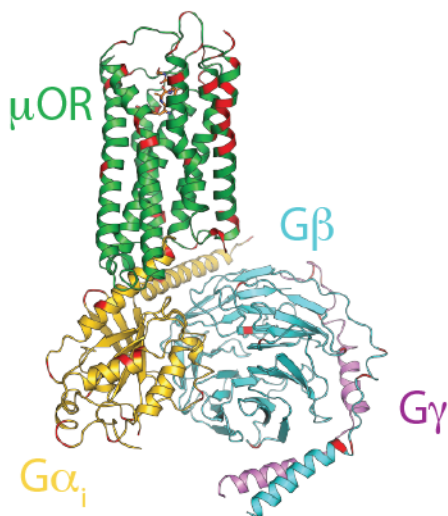

Stubbed Residues

| μOR (Chain R)             |                                                                                                 |                                                  |                                                  |                                                  |                                                  |                        |
|---------------------------|-------------------------------------------------------------------------------------------------|--------------------------------------------------|--------------------------------------------------|--------------------------------------------------|--------------------------------------------------|------------------------|
| TM1                       | Met 65 <sup>1,29</sup><br>Ile 77 <sup>1,41</sup>                                                | Val 66 <sup>1,30</sup><br>Val 80 <sup>1,44</sup> | Ile 69 <sup>1,33</sup><br>Val 81 <sup>1,45</sup> | Met 72 <sup>1,36</sup><br>Val 94 <sup>1,58</sup> | Leu 74 <sup>1,38</sup><br>Arg 95 <sup>1,59</sup> | Ser 76 <sup>1,40</sup> |
| ICL1                      | Lys 100 <sup>1,25,51</sup>                                                                      |                                                  |                                                  |                                                  |                                                  |                        |
| TM2                       | Asp 114 <sup>2,50</sup> Ser 119 <sup>2,55</sup> Ser 125 <sup>2,61</sup> Leu 129 <sup>2,65</sup> |                                                  |                                                  |                                                  |                                                  |                        |
| ECL1                      | Thr 132 <sup>2,3,4,9</sup>                                                                      |                                                  |                                                  |                                                  |                                                  |                        |
| TM3                       | Asn 137 <sup>3,22</sup> Ile 138 <sup>3,23</sup>                                                 |                                                  |                                                  |                                                  |                                                  |                        |
| TM4                       | Lys 185 <sup>4,43</sup>                                                                         | Ile 186 <sup>4,44</sup>                          | Ile 193 <sup>4,51</sup>                          | Met 203 <sup>4,61</sup>                          |                                                  |                        |
| ECL2                      | Gln 212 Ile 215 Phe 221                                                                         |                                                  |                                                  |                                                  |                                                  |                        |
| TM5                       | Asn 230 <sup>5,36</sup> Leu 246 <sup>5,52</sup>                                                 |                                                  |                                                  |                                                  |                                                  |                        |
| TM6                       | Val 291 <sup>6,46</sup>                                                                         | Thr 294 <sup>6,49</sup>                          | Lys 303 <sup>6,58</sup>                          |                                                  |                                                  |                        |
| TM7                       | Phe 313 <sup>7,30</sup> Ser 317 <sup>7,34</sup>                                                 |                                                  |                                                  |                                                  |                                                  |                        |
| Helix 8                   | Phe 343 <sup>8,50</sup>                                                                         | Lys 344 <sup>8,51</sup>                          | Arg 345 <sup>8,52</sup>                          |                                                  |                                                  |                        |
| Gα <sub>i</sub> (Chain A) |                                                                                                 |                                                  |                                                  |                                                  |                                                  |                        |
| Leu 5                     | Glu 28                                                                                          | Glu 43                                           | Cys 192                                          | Asp 193                                          | Glu 207                                          | Asn 241                |
| Lys 270                   | Glu 275                                                                                         | Lys 279                                          | Lys 280                                          | Ile 285                                          | Cys 305                                          | Glu 308                |
| Thr 327                   | Asp 337                                                                                         | Asp 350                                          |                                                  |                                                  |                                                  |                        |
| Gβ (Chain B)              |                                                                                                 |                                                  |                                                  |                                                  |                                                  |                        |
| Lys 23                    | Cys 25                                                                                          | Ser 31                                           | Glu 130                                          | Met 217                                          | Cys 271                                          | Lys 301                |
| Asp 312                   | Cys 317                                                                                         |                                                  |                                                  |                                                  |                                                  |                        |
| Gγ (Chain C)              |                                                                                                 |                                                  |                                                  |                                                  |                                                  |                        |
| Asp 48                    | Val 54                                                                                          | Ser 57                                           | Glu 58                                           |                                                  |                                                  |                        |

### Supplemental Figure 2

Residues of the  $\mu$ OR-G<sub>i</sub> complex without scFv16 (scFv16 subtracted) for which we could not observe density were stubbed at the C $\beta$  position. Top: snake diagram of the  $\mu$ OR showing that the majority of stubbed residues were in the extracellular ends of the transmembrane helices, as well as much of TM1.

Bottom left: model of the  $\mu$ OR-G<sub>i</sub> complex with stubbed residues colored red. Bottom right: Full list of all residues that we could not model correctly.

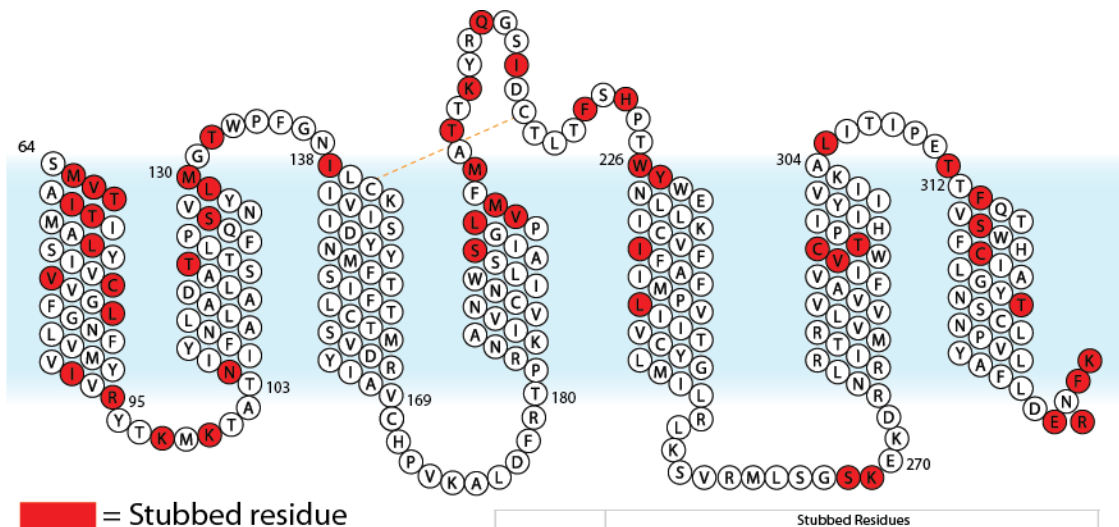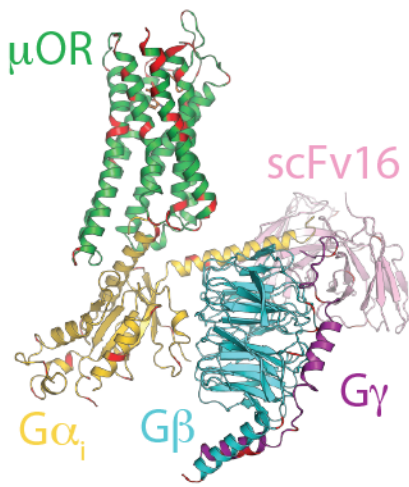

|                         | Stubbed Residues         |                          |                         |                         |                         |                        |
|-------------------------|--------------------------|--------------------------|-------------------------|-------------------------|-------------------------|------------------------|
| <b>uOR (Chain R)</b>    |                          |                          |                         |                         |                         |                        |
| TM1                     | Met 65 <sup>1,20</sup>   | Val 66 <sup>1,30</sup>   | Thr 67 <sup>1,31</sup>  | Ile 69 <sup>1,33</sup>  | Thr 70 <sup>1,32</sup>  | Leu 74 <sup>1,38</sup> |
|                         | Cys 79 <sup>4,43</sup>   | Val 80 <sup>1,44</sup>   | Leu 83 <sup>1,47</sup>  | Ile 93 <sup>1,57</sup>  | Arg 95 <sup>1,59</sup>  |                        |
| ICL1                    | Lys 98 <sup>12,40</sup>  | Lys 100 <sup>12,51</sup> |                         |                         |                         |                        |
| TM2                     | Asn 104 <sup>2,40</sup>  | Thr 118 <sup>2,54</sup>  | Ser 125 <sup>2,41</sup> | Leu 129 <sup>2,45</sup> | Met 130 <sup>2,66</sup> |                        |
| ECL1                    | Thr 132 <sup>23,40</sup> |                          |                         |                         |                         |                        |
| TM3                     | Ile 138 <sup>3,23</sup>  |                          |                         |                         |                         |                        |
| TM4                     | Ser 196 <sup>4,54</sup>  | Leu 200 <sup>4,58</sup>  | Val 202 <sup>4,60</sup> | Met 203 <sup>4,61</sup> | Met 205 <sup>4,63</sup> |                        |
| ECL2                    | Thr 207                  | Lys 209                  | Ile 215                 | Phe 221                 | His 223                 |                        |
| TM5                     | Trp 226 <sup>6,32</sup>  | Tyr 227 <sup>6,33</sup>  | Ile 238 <sup>6,44</sup> | Leu 246 <sup>6,52</sup> |                         |                        |
| ICL3                    | Ser 268                  |                          |                         |                         |                         |                        |
| TM6                     | Lys 269 <sup>6,24</sup>  | Val 291 <sup>6,46</sup>  | Cys 292 <sup>6,47</sup> | Thr 294 <sup>6,40</sup> | Leu 305 <sup>6,60</sup> |                        |
| TM7                     | Thr 311 <sup>7,20</sup>  | Phe 313 <sup>7,30</sup>  | Ser 317 <sup>7,34</sup> | Cys 321 <sup>7,38</sup> | Thr 327 <sup>7,44</sup> |                        |
| Helix 8                 | Glu 341 <sup>8,48</sup>  | Phe 343 <sup>8,50</sup>  | Lys 344 <sup>8,51</sup> | Arg 345 <sup>8,52</sup> |                         |                        |
| <b>Gai (Chain A)</b>    |                          |                          |                         |                         |                         |                        |
| Asp 26                  | Glu 28                   | Glu 43                   | Lys 46                  | Glu 186                 | Aps 193                 | Glu 207                |
| Asp 229                 | Leu 232                  | Val 233                  | Lys 248                 | Lys 257                 | Asp 272                 | Lys 280                |
| Glu 289                 | Glu 297                  | Thr 327                  | Asp 328                 | Asp 350                 |                         |                        |
| <b>Gb (Chain B)</b>     |                          |                          |                         |                         |                         |                        |
| Asp 5                   | Gln 6                    | Cys 25                   | Gln 32                  | Asn 36                  | Asp 38                  | Glu 130                |
| Met 217                 |                          |                          |                         |                         |                         |                        |
| <b>Gg (Chain C)</b>     |                          |                          |                         |                         |                         |                        |
| Gln 11                  | Lys 14                   | Glu 17                   | Lys 20                  | Asp 26                  | Asp 48                  | Glu 58                 |
| <b>scFv16 (Chain E)</b> |                          |                          |                         |                         |                         |                        |
| Ser 17                  | Glu 42                   | Ser 52                   | Ser 53                  | Asp 73                  | Glu 89                  | Met 180                |
| Asp 189                 | Thr 198                  | Glu 210                  | Glu 234                 |                         |                         |                        |

### Supplemental Figure 3

Residues of the  $\mu$ OR-G<sub>i</sub> complex with scFv16 for which we could not observe density were stubbed at the C $\beta$  position. Top: snake diagram of the  $\mu$ OR showing that the majority of stubbed residues were in the extracellular ends of the transmembrane helices, as well as much of TM1.

Bottom left: model of the  $\mu$ OR-G<sub>i</sub> complex with stubbed residues colored red. Bottom right: Full list of all residues that we could not model correctly.
